# Supplementary material for: Structure and reaction mechanism of binary Ni–Al oxides as materials for lithium-ion battery anodes
Source: Royal Society of Chemistry journal article supplement (doi:10.1039/d1dt01911b), 2021-01-01

# Supporting information

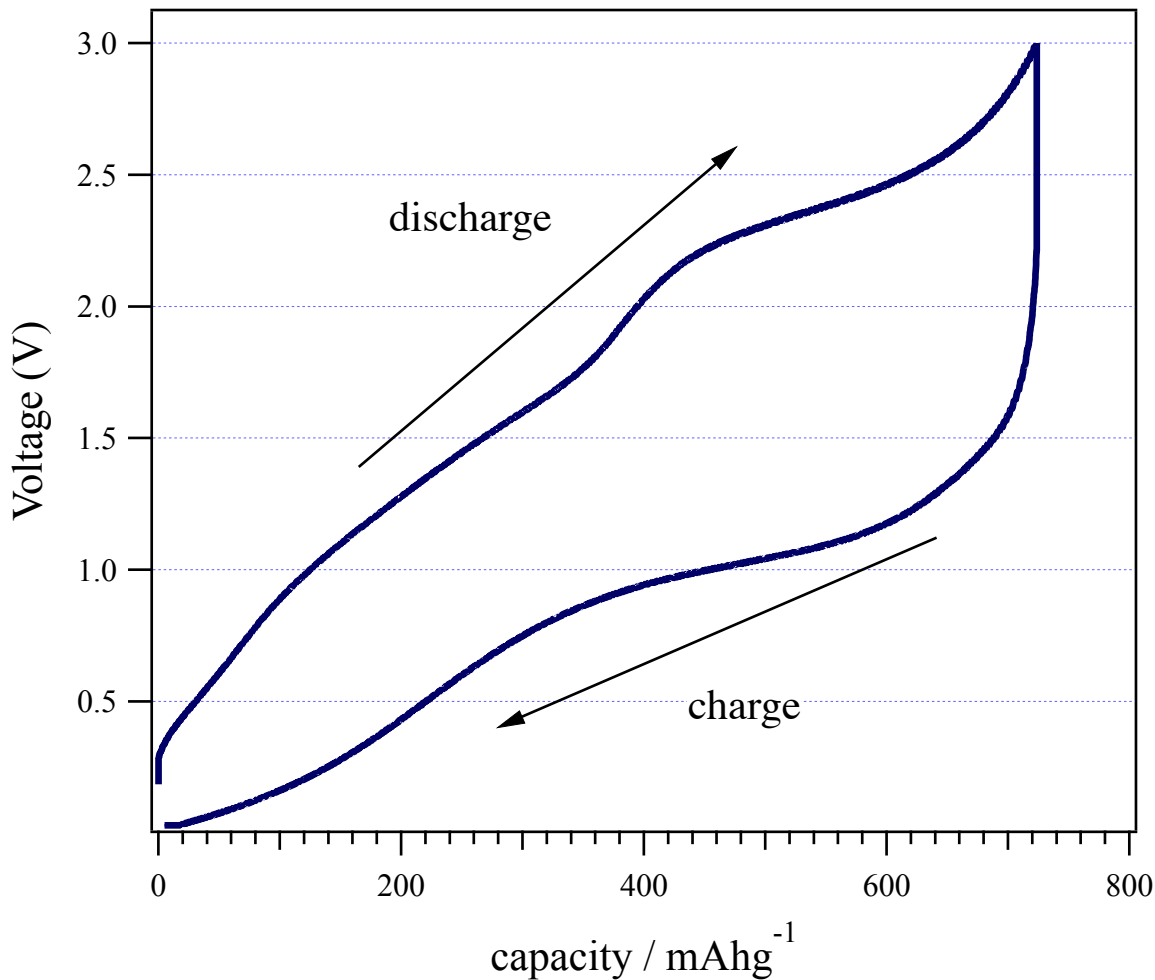

Fig. S1. Charge-discharge curve of NiO in the third cycle.

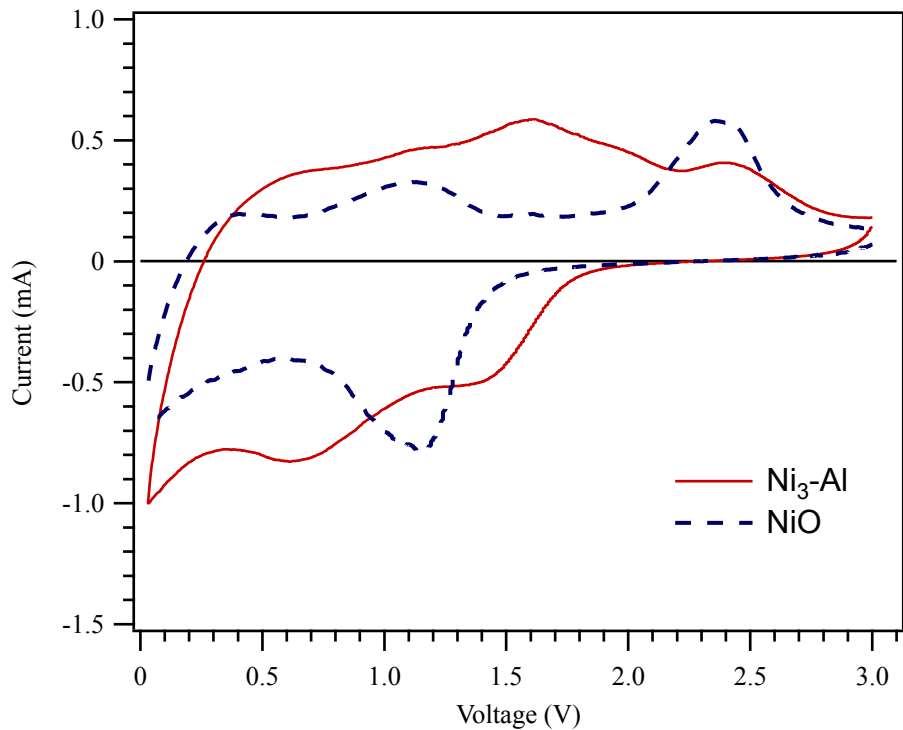

Fig. S2. Cyclic voltammograms of NiO and Ni<sub>3</sub>AlO recorded at a scan rate of  $0.1 \text{ mV s}^{-1}$ .

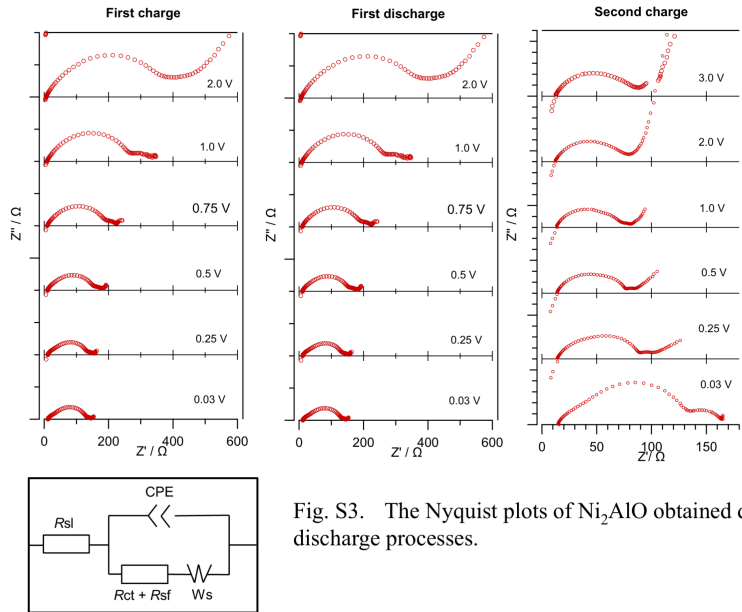

Fig. S3. The Nyquist plots of  $\text{Ni}_2\text{AlO}$  obtained during charge-discharge processes.

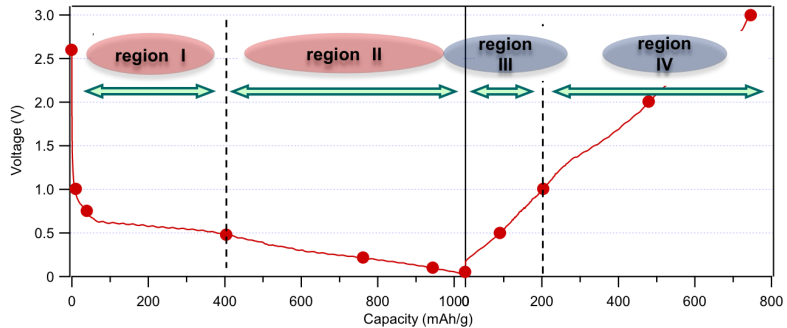

Fig. S4. The charge-discharge curves of Ni<sub>2</sub>AlO in the first cycle.

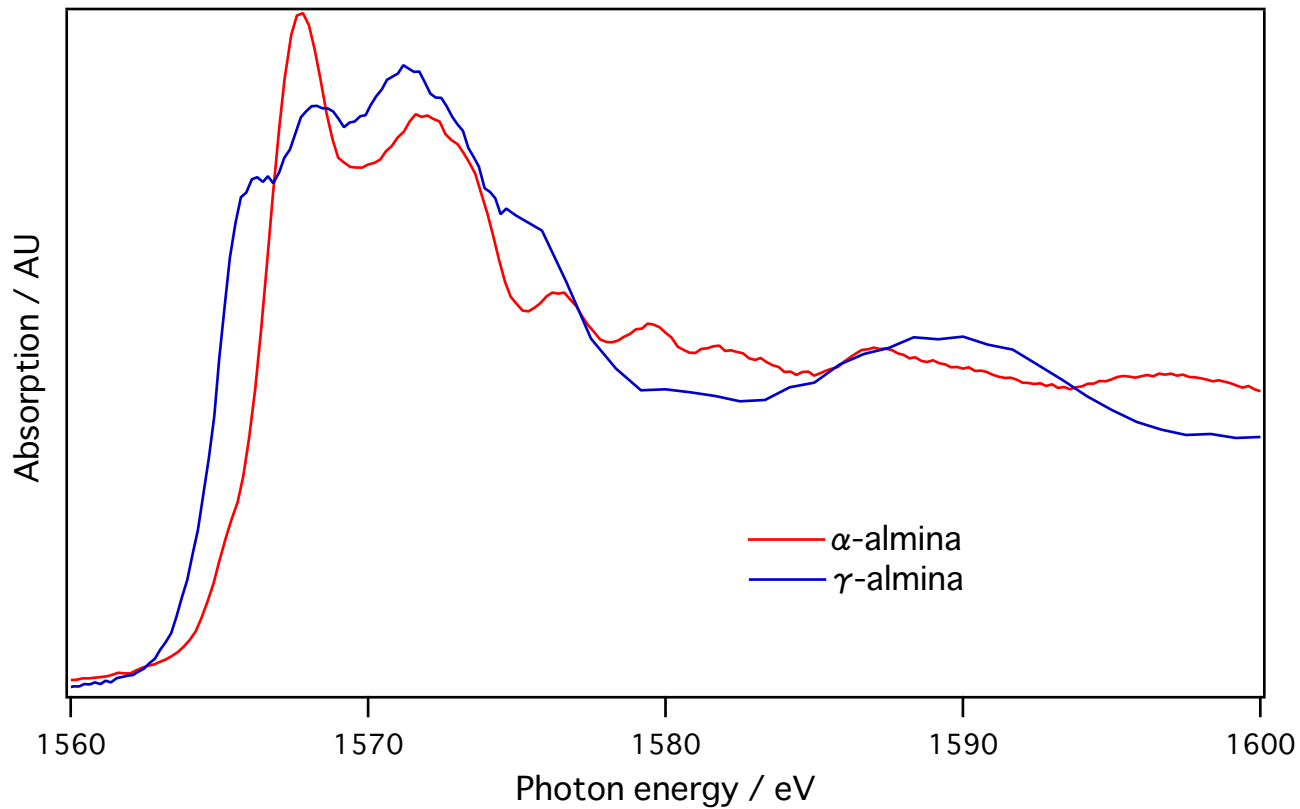

Fig. S5. XAFS spectra of  $\alpha$ - and  $\gamma$ - $\text{Al}_2\text{O}_3$ .

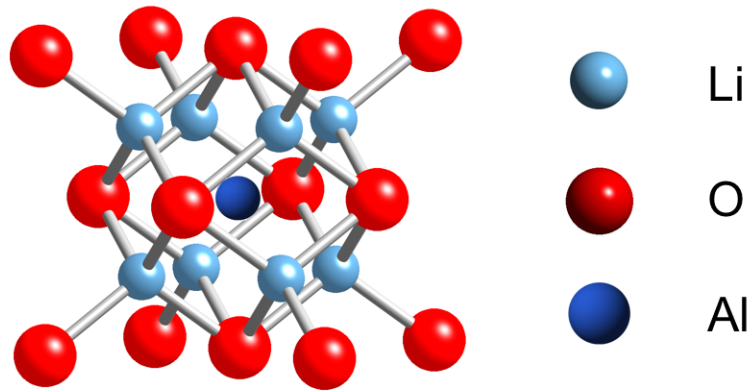

Fig. S6 The structural model of an Al metal particle surrounded by  $\text{Li}_2\text{O}$ .

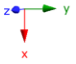

Supplement: d1dt01911b1.pdf [file d1dt01911b1.pdf]
